# Supplementary material for: In vivo genetic dissection of tumor growth and the Warburg effect
Source: eLife. 2016 Sep 1;5:e18126. doi: 10.7554/eLife.18126 (PMC5030086; doi:10.7554/eLife.18126)
Supplement: Figure 5—source data 1. — The quantitative intensity values of immuno-stainning (pPDHK, totalPDHK, pPDH, pSrc, pJNK) images between different genotype used in Figure 5p–t are shown. DOI: http://dx.doi.org/10.7554/eLife.18126.011 [file elife-18126-fig5-data1.xlsx]

## Sheet: pPDHK expression
control	dpp>Pvract	dpp>PI3Kact+hRafact	dpp>Pvract+Src42ARNAi	dpp>Pvract+BskDN
54.019	128.781	67.659	92.593	89.36
52.22	133.741	68.234	67.969	71.955
62.749	140.455	58.006	70.651	74.327
56.422	108.226	58.959	74.008	70.198
	113.584	65.44	74.553	64.104
	81.872	57.445	84.759	86.713
	82.439	62.008		87.819
	102.663	53.371		80.195
	99.685	64.997

## Sheet: total PDHK expression
control	dpp>Pvract	dpp>PI3Kact+hRafact	dpp>Pvract+Src42ARNAi	dpp>Pvract+BskDN
41.619	58.604	108.609	64.904	48.045
41.459	81.45	75.687	64.445	62.286
40.183	55.83	98.874	59.621	70.666
37.972	60.848	110.533	50.724	65.181
	51.294	73.291	56.607	75.886
	54.367	103.182	66.706	63.129
	57.135	113.129	71.343
	80.996	87.53	55.878

## Sheet: pPDH expression
control	dpp>Pvract	dpp>PI3Kact+hRafact	dpp>Pvract+Src42ARNAi	dpp>Pvract+BskDN
41.619	58.604	108.609	64.904	48.045
41.459	81.45	75.687	64.445	62.286
40.183	55.83	98.874	59.621	70.666
37.972	60.848	110.533	50.724	65.181
	51.294	73.291	56.607	75.886
	54.367	103.182	66.706	63.129
	57.135	113.129	71.343
	80.996	87.53	55.878

## Sheet: pSrc expression
control	dpp>Pvract	dpp>PI3Kact+hRafact	dpp>Pvract+Src42ARNAi
52.157	84.688	45.043	70.45
55.342	117.292	68.873	68.919
56.125	128.168	66.158	73.594
	95.003	53.805	61.461
	115.294	54.805	78.131
	104.367		89.532
	126.694		89.397
	124.634		65.731

## Sheet: pJNK expression
control	dpp>Pvract	dpp>PI3Kact+hRafact	dpp>Pvract+Src42ARNAi
49.845	96.108	51.596	71.592
41.536	115.125	53.094	66.521
45.447	110.248	48.988	79.453
45.102	88.385	42.293	83.831
	86.332	58.013	66.782
	111.466	58.282	59.712
	85.963		78.076
	106.59
